# Supplementary material
Source: MDPI journal article supplement (https://www.mdpi.com/2072-4292/14/1/194)
Supplement: s1 [file s1]

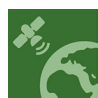

## Supplementary Materials

Table S1. Characteristics of satellite data used.

| Band                    | Wavelength (nm) | Resolution (m) | Band Applications                                                                                  |
|-------------------------|-----------------|----------------|----------------------------------------------------------------------------------------------------|
| <b>Landsat-5 TM</b>     |                 |                |                                                                                                    |
| 1                       | 450 – 520       | 30             | Bathymetric mapping, distinguishing soil from vegetation, and deciduous from coniferous vegetation |
| 2                       | 520 – 0.600     | 30             | Emphasizes peak vegetation, which is useful for assessing plant vigor                              |
| 3                       | 630 – 690       | 30             | Discriminates vegetation slopes                                                                    |
| 4                       | 760 – 900       | 30             | Emphasizes biomass content and shorelines                                                          |
| 5                       | 1550 – 1750     | 30             | Discriminates moisture content of soil and vegetation; penetrates thin clouds                      |
| 6                       | 10400– 12500    | 120            | Thermal mapping and estimated soil moisture                                                        |
| 7                       | 2080 – 2350     | 30             | Hydrothermally altered rocks associated with mineral deposits                                      |
| <b>Terra/Aqua MODIS</b> |                 |                |                                                                                                    |
| 1                       | 620–670         | 250            | Land/cloud/aerosols boundaries                                                                     |
| 2                       | 841–876         | 250            |                                                                                                    |
| 3                       | 459–479         | 500            |                                                                                                    |
| 4                       | 545–565         | 500            | Land/cloud/aerosols properties                                                                     |
| 5                       | 1230–1250       | 500            |                                                                                                    |
| 6                       | 1628–1652       | 500            |                                                                                                    |
| 7                       | 2105–2155       | 500            | Ocean color/phytoplankton/biogeochemistry                                                          |
| 8                       | 405–420         | 1000           |                                                                                                    |
| 9                       | 438–448         | 1000           |                                                                                                    |
| 10                      | 483–493         | 1000           | Atmospheric water vapor                                                                            |
| 11                      | 526–536         | 1000           |                                                                                                    |
| 12                      | 546–556         | 1000           |                                                                                                    |
| 13                      | 662–672         | 1000           | Surface/cloud temperature                                                                          |
| 14                      | 673–683         | 1000           |                                                                                                    |
| 15                      | 743–753         | 1000           |                                                                                                    |
| 16                      | 862–877         | 1000           | Atmospheric temperature                                                                            |
| 17                      | 890–920         | 1000           |                                                                                                    |
| 18                      | 931–941         | 1000           |                                                                                                    |
| 19                      | 915–965         | 1000           | Cirrus clouds water vapor                                                                          |
| 20                      | 3.660–3.840     | 1000           |                                                                                                    |
| 21                      | 3.929–3.989     | 1000           |                                                                                                    |
| 22                      | 3.929–3.989     | 1000           | Cloud properties                                                                                   |
| 23                      | 4.020–4.080     | 1000           |                                                                                                    |
| 24                      | 4.433–4.498     | 1000           |                                                                                                    |
| 25                      | 4.482–4.549     | 1000           | Ozone                                                                                              |
| 26                      | 1.360–1.390     | 1000           |                                                                                                    |
| 27                      | 6.535–6.895     | 1000           |                                                                                                    |
| 28                      | 7.175–7.475     | 1000           | Surface/cloud temperature                                                                          |
| 29                      | 8.400–8.700     | 1000           |                                                                                                    |
| 30                      | 9.580–9.880     | 1000           |                                                                                                    |
| 31                      | 10.780–11.280   | 1000           | Cloud top altitude                                                                                 |
| 32                      | 11.770–12.270   | 1000           |                                                                                                    |
| 33                      | 13.185–13.485   | 1000           |                                                                                                    |
| 34                      | 13.485–13.785   | 1000           |                                                                                                    |
| 35                      | 13.785–14.085   | 1000           |                                                                                                    |
| 36                      | 14.085–14.385   | 1000           |                                                                                                    |

## S1. MODIS Fire Radiative Power description

FRP values (MW) stored in the Collection 5 MODIS fire product suite are calculated using the equation originally formulated by *Kaufman et al.* [1] and amended by *Giglio* [2] to account for variations in pixel size across the swath:

$$\text{FRP} = A_s \beta (T_f^8 - T_b^8) \quad (\text{S1})$$

where  $T_f$  is the 4  $\mu\text{m}$  brightness temperature of the fire pixel,  $T_b$  is the mean 4  $\mu\text{m}$  brightness temperature of the background window,  $A_s$  is the nominal MODIS pixel area evaluated at the scan angle, or sample number,  $s$ , and the coefficient  $\beta = 4.34 \times 10^{-19} \text{ Wm}^{-2}\text{K}^{-8}$  is specific to the MODIS 4  $\mu\text{m}$  spectral response. Although  $T_b$  is representative of a window that expands until at least 25% of the surrounding pixels are identified as valid cloud-free land pixels that are also not fire pixels [2], it is still possible for  $T_b$  to be influenced by hot spots in the background window but not recognized by the MODIS active fire detection algorithm [3].

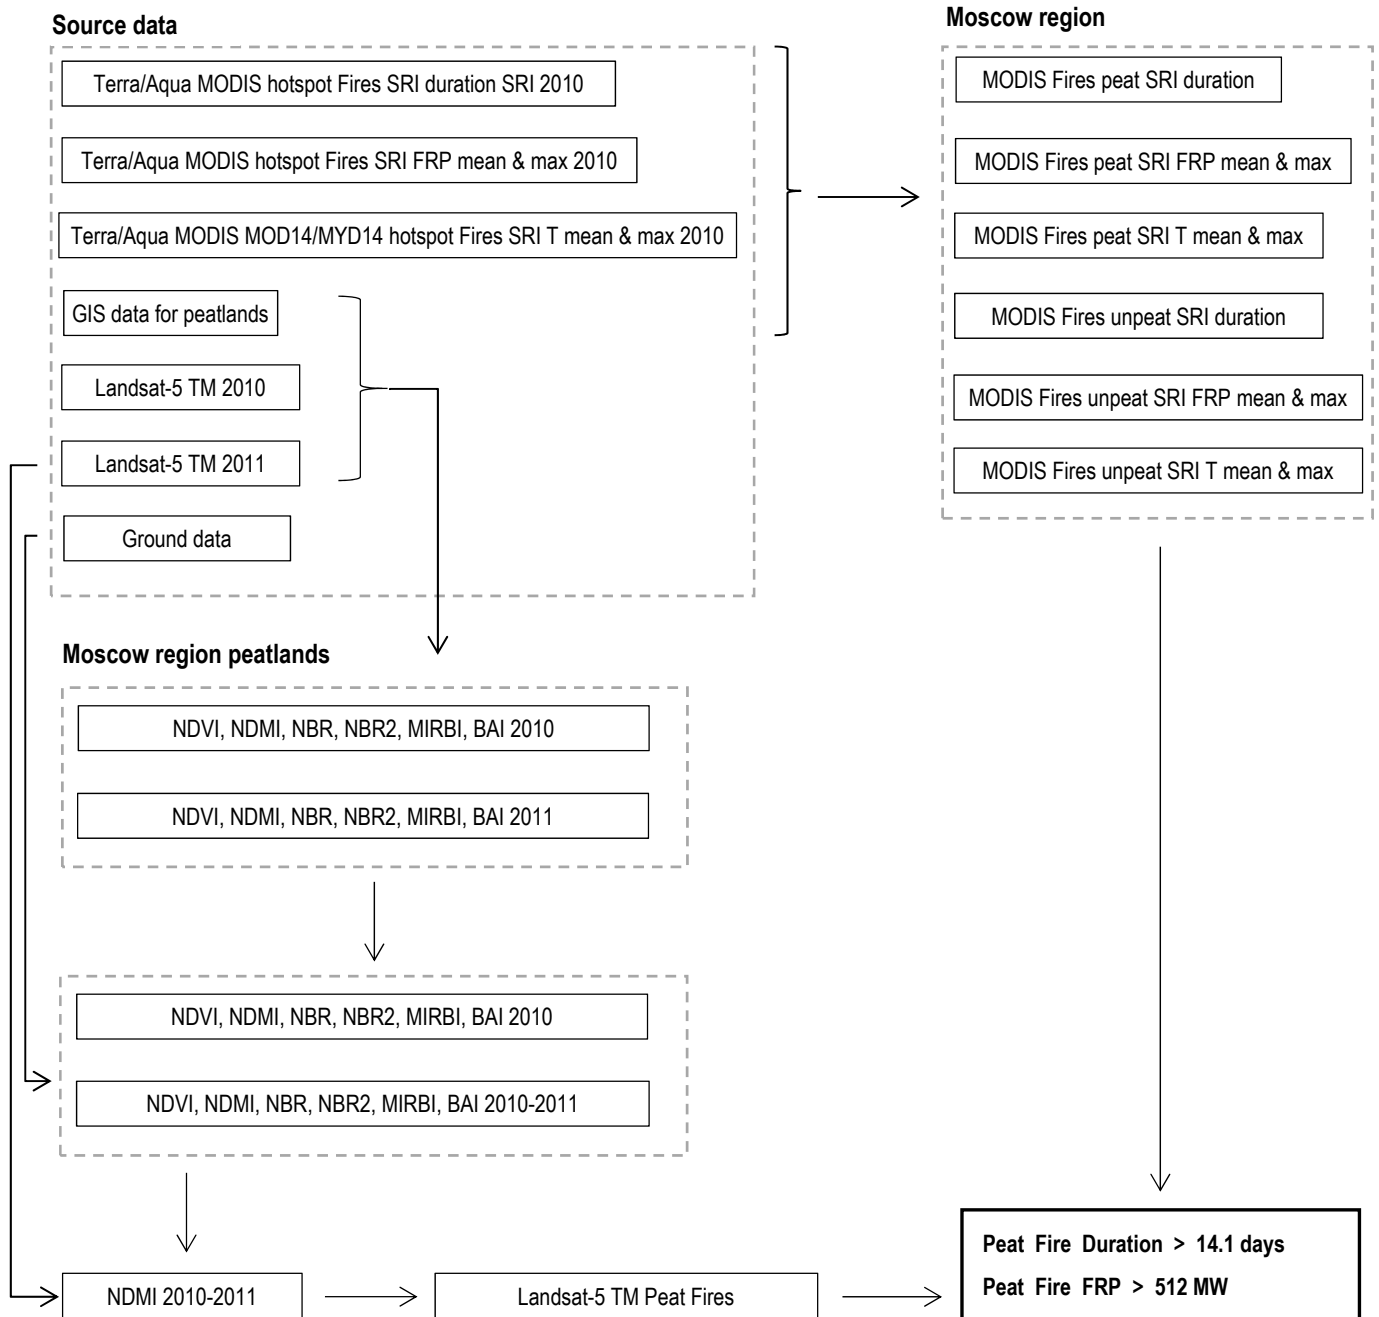

**Figure S1.** Processing chain.

## References

1. Kaufman, Y.J.; Justice, C.O.; Flynn, L.P.; Kendall, J.D.; Prins, E.M.; Giglio, L.; Ward, D.E.; Menzel, W.P.; Setzer, A.W. Potential global fire monitoring from EOS-MODIS. *J. Geophys. Res.* **1998**, *103*, 32215–32238.
2. Giglio, L.; Descloitres, J.; Justice, C.O.; Kaufman, Y.J. An enhanced contextual fire detection algorithm for MODIS. *Remote Sens. Environ.* **2003**, *87*, 273–282.
3. Freeborn, P.H.; Wooster, M.J.; Roy, D.P.; Cochrane, M.A. Quantification of MODIS fire radiative power (FRP) measurement uncertainty for use in satellite-based active fire characterization and biomass burning estimation. *Geophys. Res. Lett.* **2014**, *41*. <https://doi.org/10.1002/2013GL059086>.
